# Supplementary material for: Perspectives on Corrosion Inhibition Features of Novel Synthesized Gemini-Fluorinated Cationic Surfactants Bearing Varied Spacers for Acid Pickling of X60-Steel: Practical, and In Silico Calculations
Source: MDPI journal article supplement (doi:10.3390/ma16145192), 2023-07-24
Supplement: s1 [file s1]

## **Supporting information**



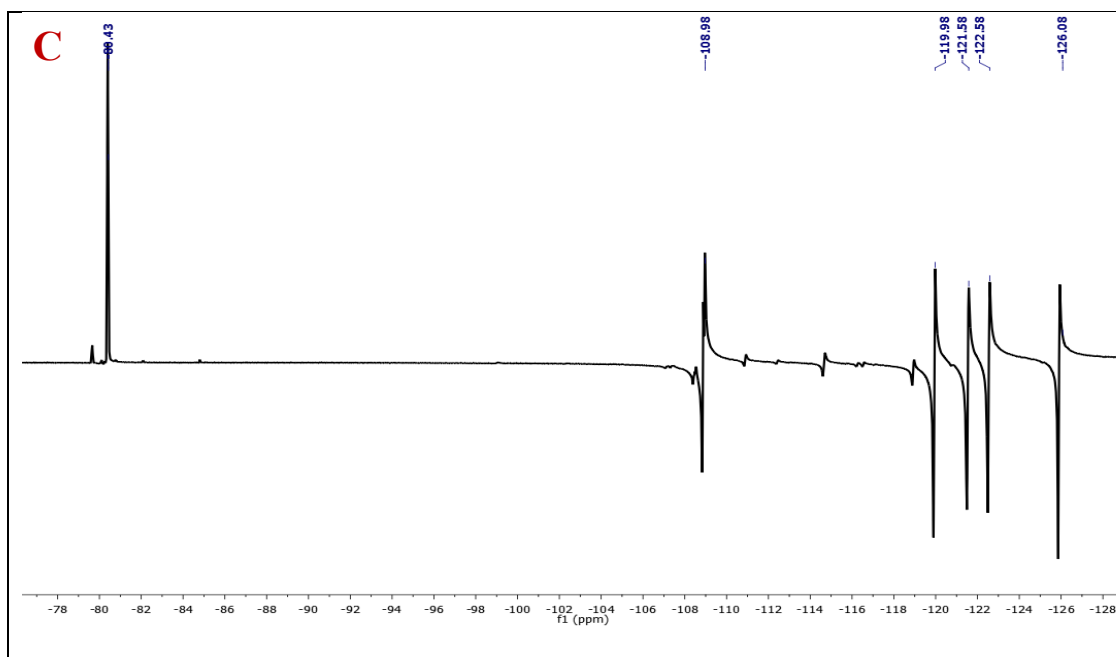

**Figure S1.**  $^1\text{H}$  (A),  $^{13}\text{C}$  (B) and  $\text{F}^{19}$  NMR(C) spectra of *N*-(3-(dimethylamino)propyl)-1,1,2,2,3,3,4,4,5,5,6,6,6-tridecafluorohexane-1-sulfonamide

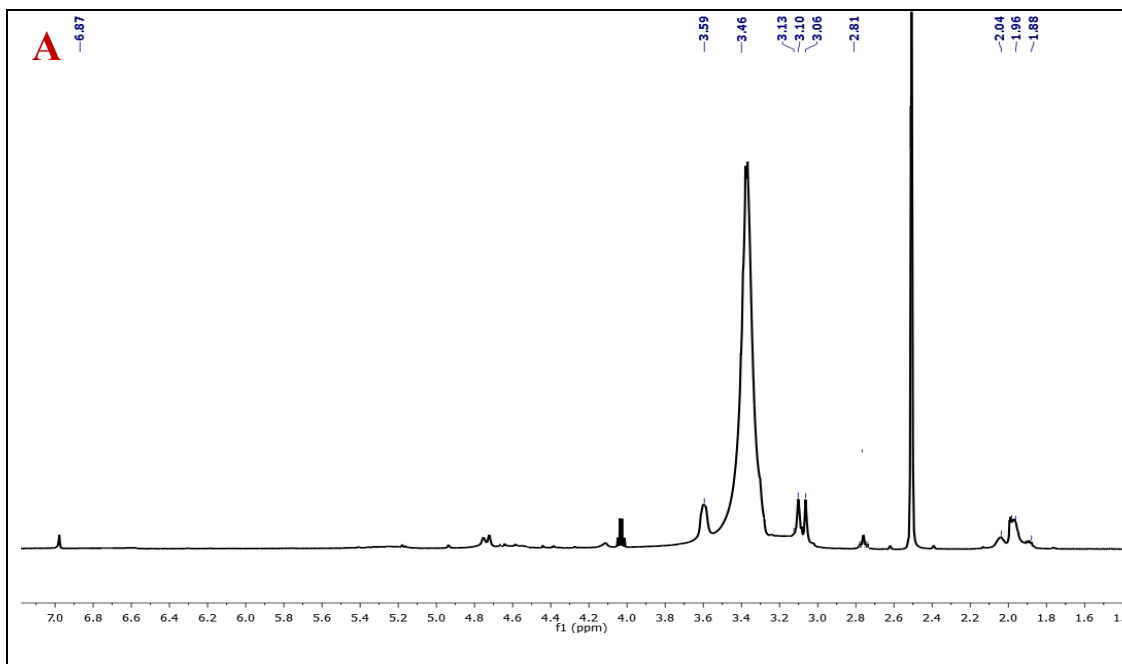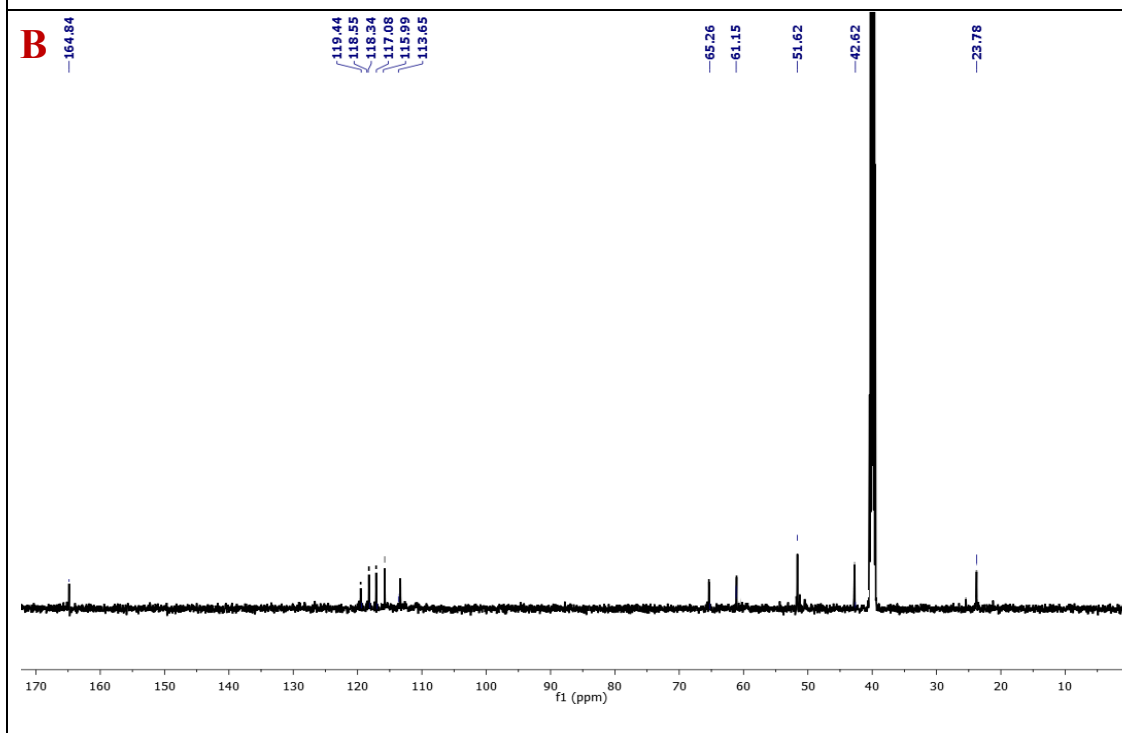

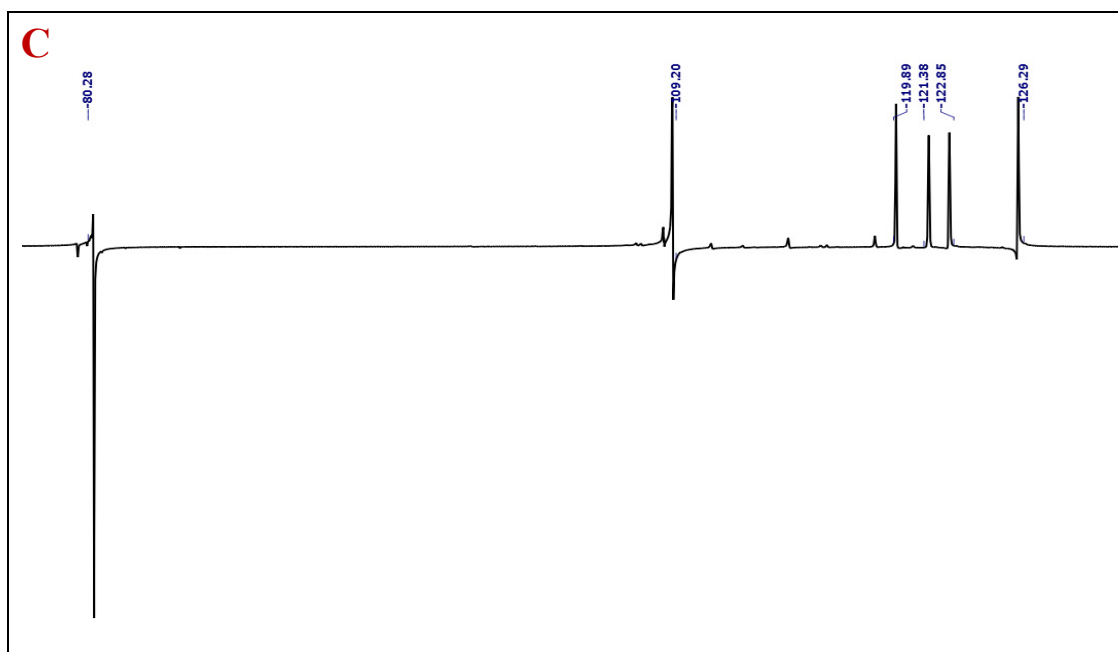

**Figure S2.**  $^1H$  (A),  $^{13}C$  (B) and  $F^{19}$  NMR(C) spectra of  $N^I, N^I, N^4, N^4$ -tetramethyl- $N^I, N^4$ -bis(3-((perfluorohexyl)sulfonamido)propyl)butane-1,4-diaminium iodide (**3a**, FSG6-2).

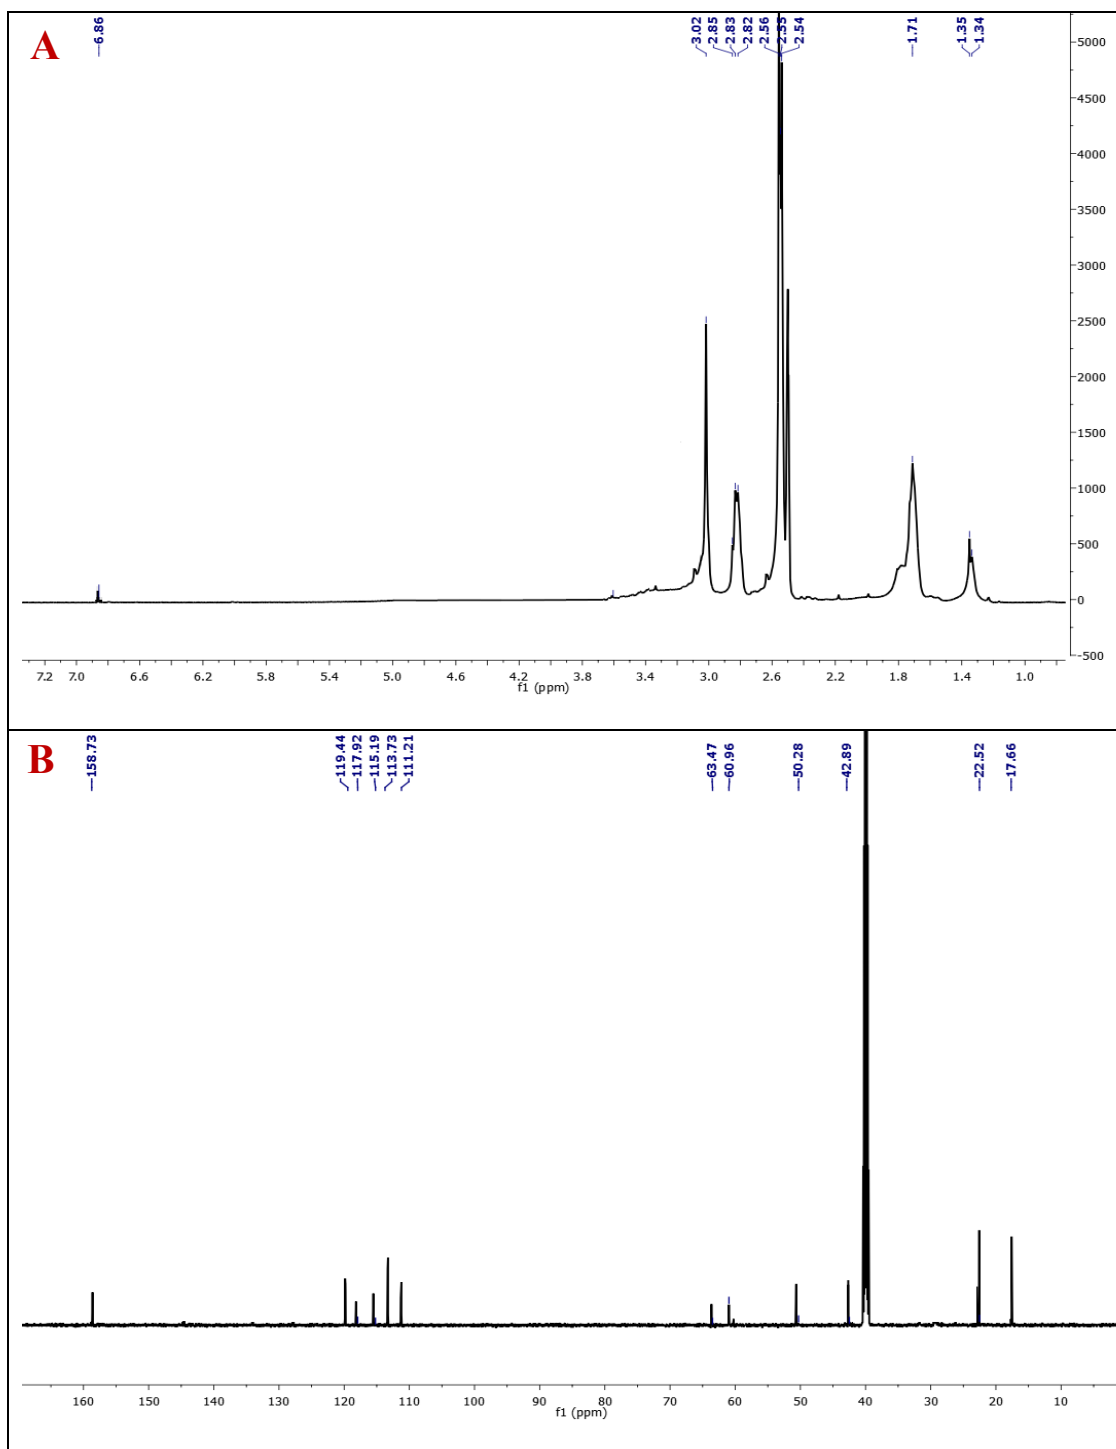

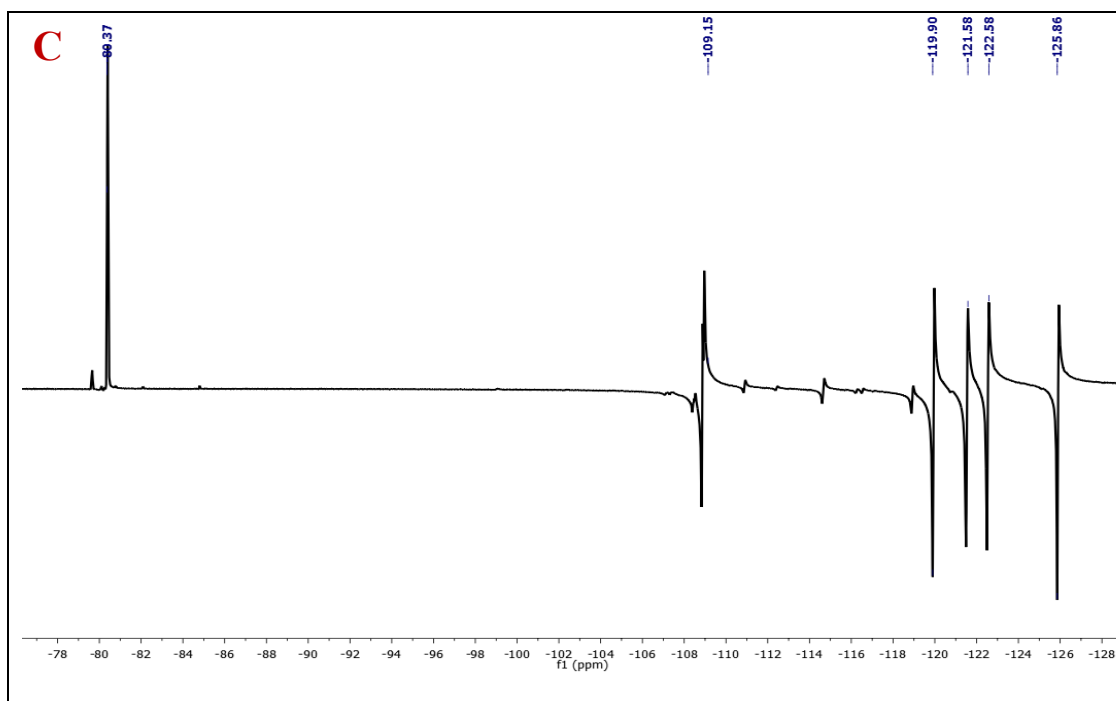

**Figure S3.**  $^1\text{H}$  (A),  $^{13}\text{C}$  (B) and  $\text{F}^{19}$  NMR(C) spectra of  $N^l, N^l, N^d, N^d$ -tetramethyl- $N^l, N^d$ -bis(3-((perfluorohexyl)sulfonamido)propyl)butane-1,4-diaminium iodide (**3b**, FSG6-4)

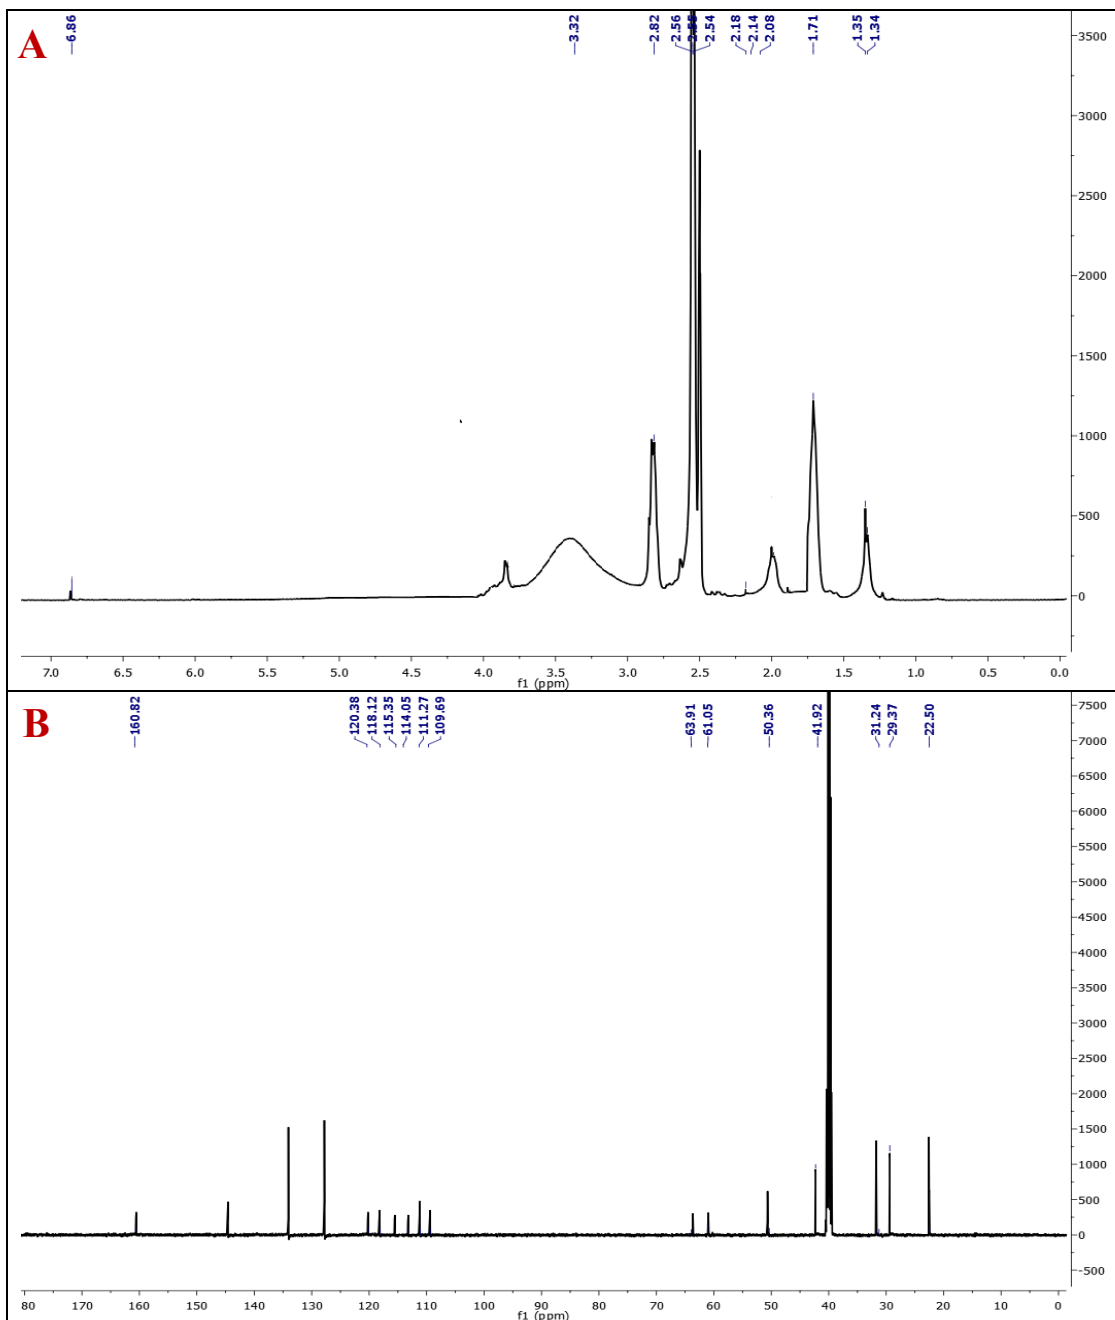



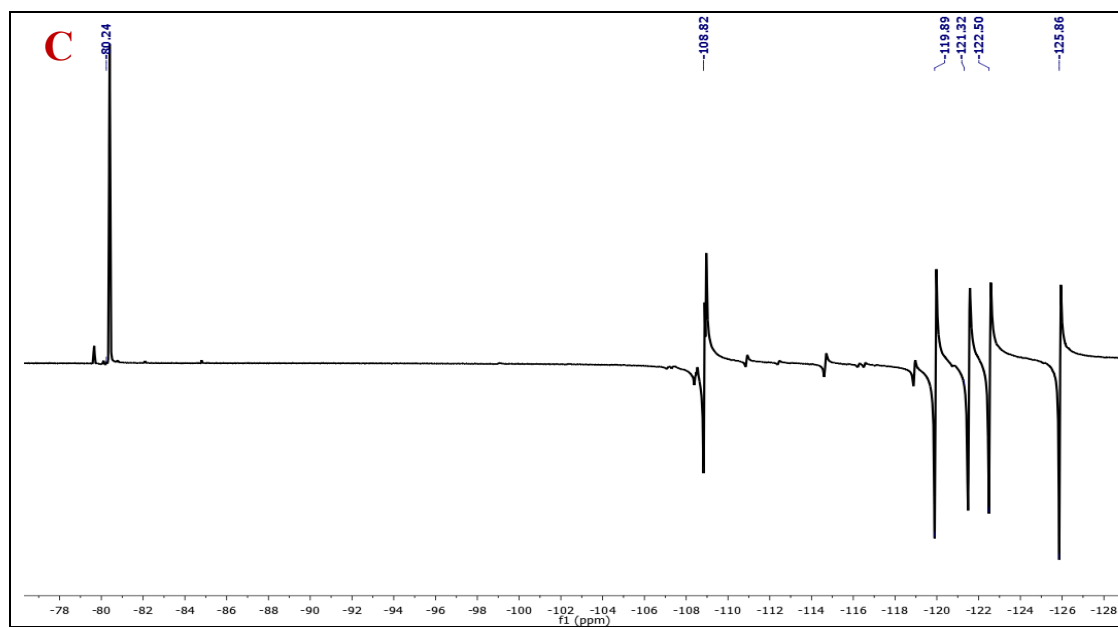

**Figure S4.**  $^1\text{H}$  (A),  $^{13}\text{C}$  (B) and  $\text{F}^{19}$  NMR(C) spectra of  $N^l, N^l, N^6, N^6$ -tetramethyl- $N^l, N^6$ -bis(3-((perfluorohexyl)sulfonamido)propyl)hexane-1,6-diaminium iodide (**3c**, **FSG6-6**).
